# Supplementary material
Source: PubMed Central journal article supplement (PMC6311496)
Supplement: supp_RA118.005667_140527_1_supp_216226_pgfnpx.pdf [file supp_RA118.005667_140527_1_supp_216226_pgfnpx.pdf]

Identification of a butenolide signaling system that regulates nikkomycin biosynthesis in *Streptomyces*

**Wenxi Wang<sup>a,b,\*</sup>, Jihui Zhang<sup>a,1\*</sup>, Xiang Liu<sup>a,b</sup>, Dong Li<sup>a,b</sup>, Yue Li<sup>a</sup>,  
Yuqing Tian<sup>a,b</sup>, Huarong Tan<sup>a,b,2</sup>**

From the <sup>a</sup>State Key Laboratory of Microbial Resources, Institute of Microbiology, Chinese Academy of Sciences, Beijing 100101, China; <sup>b</sup>School of Life Sciences, University of the Chinese Academy of Sciences, Beijing 100039, China.

### **Supporting Information**

Supporting Information contains 2 supplementary tables (Table S1 and S2) and 6 supplementary figures (Figure S1-S6).

#### **Supplementary Tables**

Table S1. <sup>1</sup>H-NMR and <sup>13</sup>C-NMR data of SAB1 in CDCl<sub>3</sub>.

Table S2. Primers used in this study.

#### **Supplementary Figures**

Figure S1. HRMS and NMR analyses of SAB1 from *E. coli* C41 containing *sabAPD*.

Figure S2. HRMS and NMR analyses of SAB1 and SAB2 from *S. coelicolor* M1146 containing *sabAPD*.

Figure S3. HRMS and NMR analyses of SAB3 from *S. coelicolor* M1146 containing *sabAPD*.

Figure S4. LC-MS analysis of SABs in *S. ansochromogenes* 7100.

Figure S5. qRT-PCR transcriptional analyses of *sabR1*, *sabR2* and *sabA* in WT,  $\Delta$ sabA and  $\Delta$ sabA/ $\Delta$ sabR1.

Figure S6. Effect of *sabR2* disruption and overexpression on nikkomycin production.

**Table S1. <sup>1</sup>H-NMR and <sup>13</sup>C-NMR data of SAB1 in CDCl<sub>3</sub>**

| Position              | <sup>1</sup> H (δ, mult., <i>J</i> ) | <sup>13</sup> C (δ) |
|-----------------------|--------------------------------------|---------------------|
| C(2)                  |                                      | 172.085             |
| C(3)                  |                                      | 130.389             |
| C(4)                  |                                      | 158.126             |
| C(5)                  | 5.861, s                             | 98.885              |
| C(1')                 | 4.504, t, 7                          | 66.412              |
| C(2')                 | 1.8, m/1.64, m                       | 38.233              |
| C(3')                 | 1.42, m/1.3, m                       | 18.786              |
| C(4')                 | 0.937, t, 7.5                        | 13.794              |
| CH <sub>3</sub> -C(4) | 2.083, s                             | 11.637              |

Chemical shifts δ in ppm relative to TMS. Coupling constants *J* in Hz. s, singlet. t, triplet. m, multiplet.

**Table S2. Primers used in this study**

| Primers | Sequence (5'-3')                   | Purpose                     |
|---------|------------------------------------|-----------------------------|
| sabALF  | GGAATTCGCGATGCTGCTGTTGTTGACGA      | <i>sabA</i> disruption      |
| sabALR  | GCTCTAGAGGGTCCGTAGAAAGGTGTGCGC     | <i>sabA</i> disruption      |
| sabARF  | GCTCTAGATTCCACCGGTACGCGGAGCTG      | <i>sabA</i> disruption      |
| sabARR  | CCCAAGCTTACCAAGGGCAAGTGGACGCCAT    | <i>sabA</i> disruption      |
| sabAcF  | CGCGGATCCGGATTCATCTCTCCTCCCGCG     | <i>sabA</i> complement      |
| sabAcR  | GCTCTAGATACGTCGTGGTCAGGCCGTG       | <i>sabA</i> complement      |
| sabR1LF | CGCGGATCCCAGTCAACTCTGCACGCTCCCTT   | <i>sabR1</i> disruption     |
| sabR1LR | GCTCTAGACCTGTGCGAGAATCTGCGCGAT     | <i>sabR1</i> disruption     |
| sabR1RF | GCTCTAGATCTTCGCCTACACGCTGCCCA      | <i>sabR1</i> disruption     |
| sabR1RR | CCCAAGCTTATCGAACATCTCCGCCGACGACT   | <i>sabR1</i> disruption     |
| sabR1cF | CGGAATTCGGGCTGACCCGGACGGAGAT       | <i>sabR1</i> complement     |
| sabR1cR | CGCGGATCCTCGACGCGGGAGTCTTGCA       | <i>sabR1</i> complement     |
| sabR2LF | GCTCTAGACCTTCTCCCACACGGACACGT      | <i>sabR2</i> disruption     |
| sabR2LR | GGAATTCATATGCCGTGCGGGTCGAATATCTG   | <i>sabR2</i> disruption     |
| sabR2RF | GGAATTCATATGCCGTGTGGAGTCCGTCTGTTGG | <i>sabR2</i> disruption     |
| sabR2RR | CCCAAGCTTCAGCGACTTCGAGCACGGCTAC    | <i>sabR2</i> disruption     |
| sabR2OF | GGAATTCATATGAGGGCCGAAGAGACC        | <i>sabR2</i> overexpression |
| sabR2OR | GGAATTCGACCGGCTGTGTTTTAC           | <i>sabR2</i> overexpression |
| cprCLF  | GCTCTAGATTCAGGTCGTTCTTCTTCGCC      | <i>cprC</i> disruption      |
| cprCLR  | GGAATTCATATGGCGTAACTGCCTCGCCATC    | <i>cprC</i> disruption      |
| cprCRF  | GGAATTCATATGGTCTGCTTCTTCGTCGGCA    | <i>cprC</i> disruption      |
| cprCRR  | CCCAAGCTTGCGATCATCGACTTCACCAC      | <i>cprC</i> disruption      |
| cprCcF  | GCTCTAGACCAGGTCACCCGTTTGAAG        | <i>cprC</i> complement      |
| cprCcR  | GGAATTCGGCTTCTGTGACGGACCATGG       | <i>cprC</i> complement      |
| cprCoF  | CCAATTCATATGGCGAGGCAGTTACGCG       | <i>cprC</i> overexpression  |
| cprCoR  | GGAATTCGGCTTCTGTGACGGACCATGG       | <i>cprC</i> overexpression  |
| PhrdBF  | GTCGACTCTAGACCGCCTTCCGCCG          | <i>hrdB</i> promoter        |
| PhrdBR  | GGAATTCATATGAACAACCTCTCGGAACGTTGA  | <i>hrdB</i> promoter        |
| SabR1F  | GGAATTCATATGGCACAGCAGTTGCGCGCA     | SabR1 expression            |
| SabR1R  | CCGCTCGAGGCTCGCCGGTCCGCCACCAG      | SabR1 expression            |
| CprCF   | CCAATTCATATGGCGAGGCAGTTACGCG       | CprC expression             |
| CprCR   | CCGCTCGAGGGCGGCACGGACCTCCCGTT      | CprC expression             |
| PsabR1F | AGCCTGGTGAGTCGCGGCGT               | P <sub>sabR1</sub> for EMSA |
| PsabR1R | CGCAACTGCTGTGCCATGTGTTC            | P <sub>sabR1</sub> for EMSA |
| PsabR2F | GCCATGGCCCAACTCTATGAGC             | P <sub>sabR2</sub> for EMSA |
| PsabR2R | TTGCCTCATGCGGCGGAC                 | P <sub>sabR2</sub> for EMSA |

|          |                                      |                             |
|----------|--------------------------------------|-----------------------------|
| PsabAF   | GACCATGCGGAGCTTCTCGAGCT              | P <sub>sabA</sub> for EMSA  |
| PsabAR   | GATGGGCGCAAACGTGGTCAT                | P <sub>sabA</sub> for EMSA  |
| PadpAF   | GCAAAGAGGCGGACGTCACA                 | P <sub>adpA</sub> for EMSA  |
| PadpAR   | GGCAGTGGAGTCGTGGCTCAT                | P <sub>adpA</sub> for EMSA  |
| PsanG1F  | GTCGTCGTCCGCTTCCACCT                 | P <sub>sanG1</sub> for EMSA |
| PsanG1R  | CGGGTCGGCTGTGGTGAGT                  | P <sub>sanG1</sub> for EMSA |
| PsanG2F  | ATCGCGAACACCATGAACGCA                | P <sub>sanG2</sub> for EMSA |
| PsanG2R  | AAAGGCCGTCTACTGCCGCCT                | P <sub>sanG2</sub> for EMSA |
| PsanG3F  | AGGCGGCAGTAGACGGCCTTT                | P <sub>sanG3</sub> for EMSA |
| PsanG3R  | ATGCCGGGGTCTTGCCTTT                  | P <sub>sanG3</sub> for EMSA |
| PsanFF   | GAAGTGCCGGAAGGGGTGGT                 | P <sub>sanF</sub> for EMSA  |
| PsanFR   | GTCAGCACACGGTGTCTCCTT                | P <sub>sanF</sub> for EMSA  |
| PsanO-NF | GGGTTGACCACGGATCGCAGT                | P <sub>sanON</sub> for EMSA |
| PsanO-NR | ACAGCCGTCCAGTTGCTTGCAT               | P <sub>sanON</sub> for EMSA |
| PcprCF   | CCAGGTCACCCGTTTGAAG                  | P <sub>cprC</sub> for EMSA  |
| PcprCR   | CGTAACTGCCTCGCCATCC                  | P <sub>cprC</sub> for EMSA  |
| PcprCMR  | ATAAGAATGCGGCCGCCAACCCCCGCATACGATAA  | P <sub>cprCM</sub> for EMSA |
| PcprCMF  | ATAAGAATGCGGCCGCCCGCATGTCTGTTCTTTTGA | P <sub>cprCM</sub> for EMSA |
| FAM-F    | CGGGCTGCAGGAATTCGAT                  | For DNaseI footprinting     |
| HEX-R    | GGTCGACGGTATCGATAAGCTTG              | For DNaseI footprinting     |
| qsabR1-F | ACGAACACATGGCACAGCAGTT               | <i>sabR1</i> qRT-PCR        |
| qsabR1-R | CGATGCTGGCACCGTGGTA                  | <i>sabR1</i> qRT-PCR        |
| qsabR2-F | GTGAGGGCCGAAGAGACC                   | <i>sabR2</i> qRT-PCR        |
| qsabR2-R | GCTGCTGAAGTGGAACGAGA                 | <i>sabR2</i> qRT-PCR        |
| qsabA-F  | GTCGGACTGACCACATTGACGA               | <i>sabA</i> qRT-PCR         |
| qsabA-R  | GGTCCGTAGAAGGTGTGCGC                 | <i>sabA</i> qRT-PCR         |
| qadpA-F  | GATGCCGCAGCCCGAAACT                  | <i>adpA</i> qRT-PCR         |
| qadpA-R  | GTCGATGCCGAACACCGAAAGC               | <i>adpA</i> qRT-PCR         |
| qsanG-F  | GGAGGTCATCCGTGTCAACT                 | <i>sanG</i> qRT-PCR         |
| qsanG-R  | GGAAGTCCATCTGGTCCGAG                 | <i>sanG</i> qRT-PCR         |
| qsanO-F  | TCCGCCGTGAACCGCTACTTC                | <i>sanO</i> qRT-PCR         |
| qsanO-R  | GGCACGCTCAGGAAGGTCGT                 | <i>sanO</i> qRT-PCR         |
| qsanN-F  | GACCTGACGCCAGCAGAGT                  | <i>sanN</i> qRT-PCR         |
| qsanN-R  | TCGAGGTTTCAGTCGTGAGGCG               | <i>sanN</i> qRT-PCR         |
| qsanF-F  | GAACCTCGTGGACCTCATCGT                | <i>sanF</i> qRT-PCR         |
| qsanF-R  | TGGTCGGCTTGTCTTGTGT                  | <i>sanF</i> qRT-PCR         |
| qcprC-F  | GTCTGCTTCTTCGTCGGCA                  | <i>cprC</i> qRT-PCR         |
| qcprC-R  | GGACCTCCCGTTCCAGATG                  | <i>cprC</i> qRT-PCR         |

|         |                                  |                            |
|---------|----------------------------------|----------------------------|
| q23S-F  | CTCACCTACTAACCGCTTGGT            | 23S rRNA qRT-PCR           |
| q23S-R  | CAGGGTAAGTCGGGACCTAA             | 23S rRNA qRT-PCR           |
| sabAF   | GGAATTCCATATGACCACGTTTGCGCCCAT   | SabAPD expression          |
| sabAR   | GCTCTAGATACGTCGTGGTCAGGCCGTG     | SabAPD expression          |
| sabPDF  | GCTCTAGAGGATCGCGGGAGGAGAGAT      | SabAPD expression          |
| sabPDR  | GGAATTCTTACCAATCCGTGAAGCCG       | SabAPD expression          |
| gusA-F  | GGAATTCCATATGACCGGTCTGCGGCCCG    | For GusA activity          |
| gusA-R  | CCGCTCGAGTCACTGCTTCCCGCCCTGCT    | For GusA activity          |
| PGcprCF | GACTAGTCCAGGTCACCCGTTCTGAAG      | For GusA activity          |
| PGcprCR | GGAATTCCATATGCGGACCCCTCCTCGCACCT | For GusA activity          |
| adpAoF  | GGAATTCCATATGAGCCACGACTCCACTGC   | <i>adpA</i> overexpression |
| adpAoR  | CGGAATTCTCCGTCTGCTCAGTTACCG      | <i>adpA</i> overexpression |

---

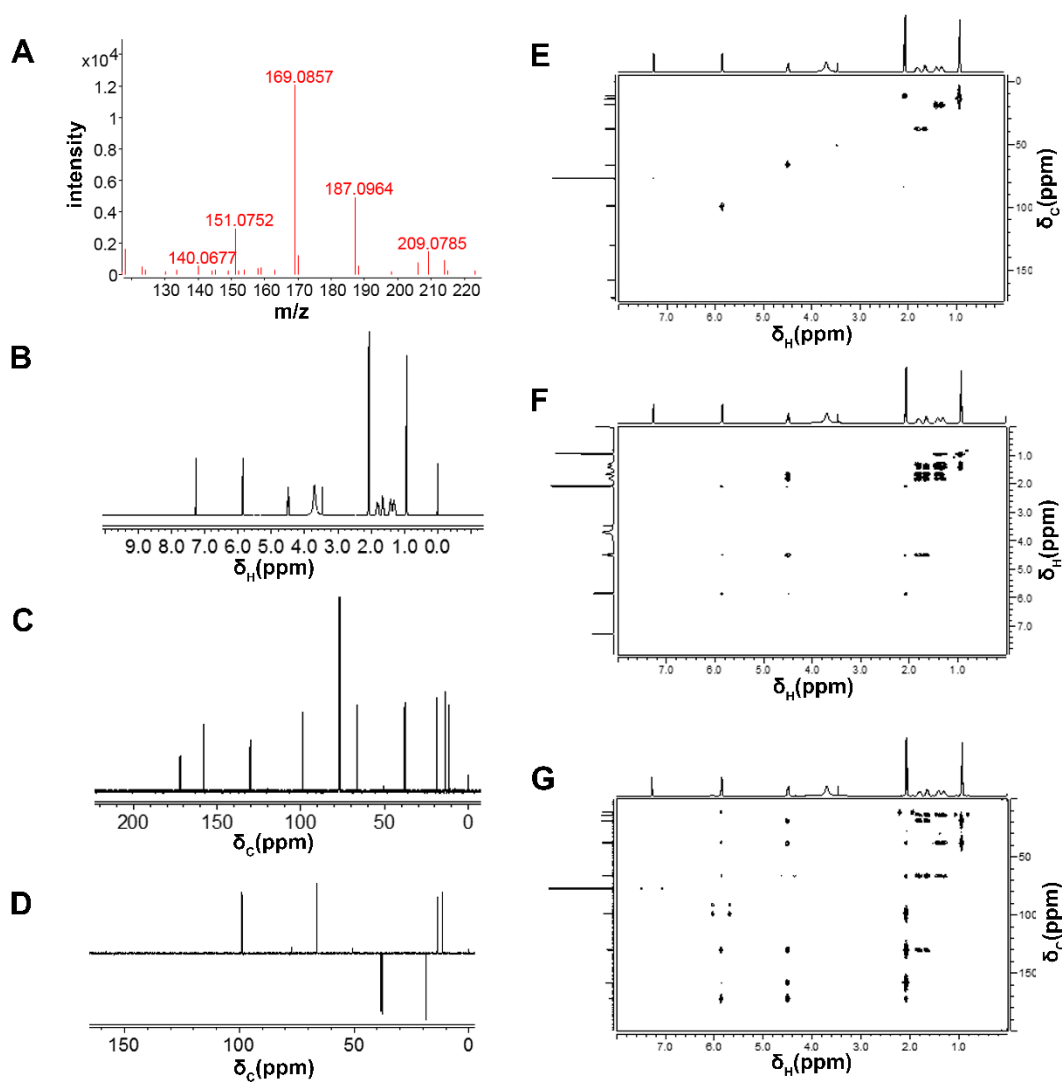

**Figure S1. HRMS and NMR analyses of SAB1 from *E. coli* C41 containing *sabAPD*.** (A) HRMS of SAB1. (B) <sup>1</sup>H-NMR spectrum of SAB1. (C) <sup>13</sup>C-NMR spectrum of SAB1. (D) DEPT135 spectrum of SAB1. (E) <sup>1</sup>H-<sup>13</sup>C HSQC spectrum of SAB1. (F) <sup>1</sup>H-<sup>1</sup>H COSY spectrum of SAB1. (G) <sup>1</sup>H-<sup>13</sup>C HMBC spectrum of SAB1.

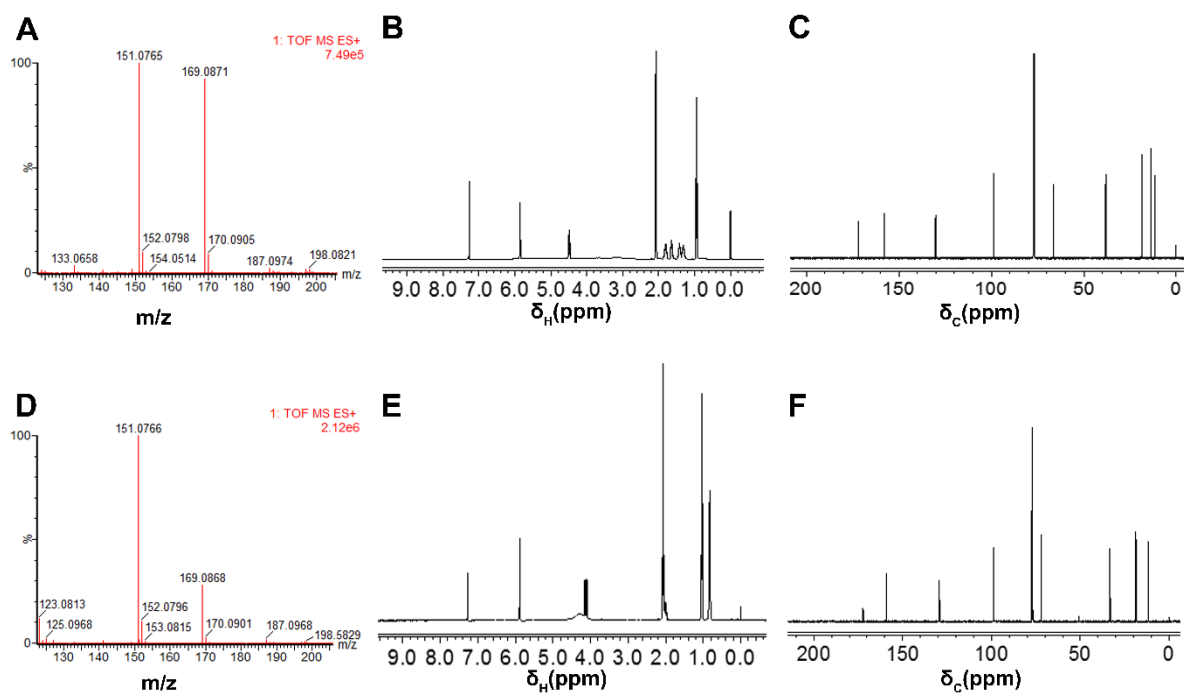

**Figure S2. HRMS and NMR analyses of SAB1 and SAB2 from *S. coelicolor* M1146 containing *sabAPD*.** (A) HRMS of SAB1. (B)  $^1\text{H}$ -NMR spectrum of SAB1. (C)  $^{13}\text{C}$ -NMR spectrum of SAB1. (D) HRMS of SAB2. (E)  $^1\text{H}$ -NMR spectrum of SAB2. (F)  $^{13}\text{C}$ -NMR spectrum of SAB2.

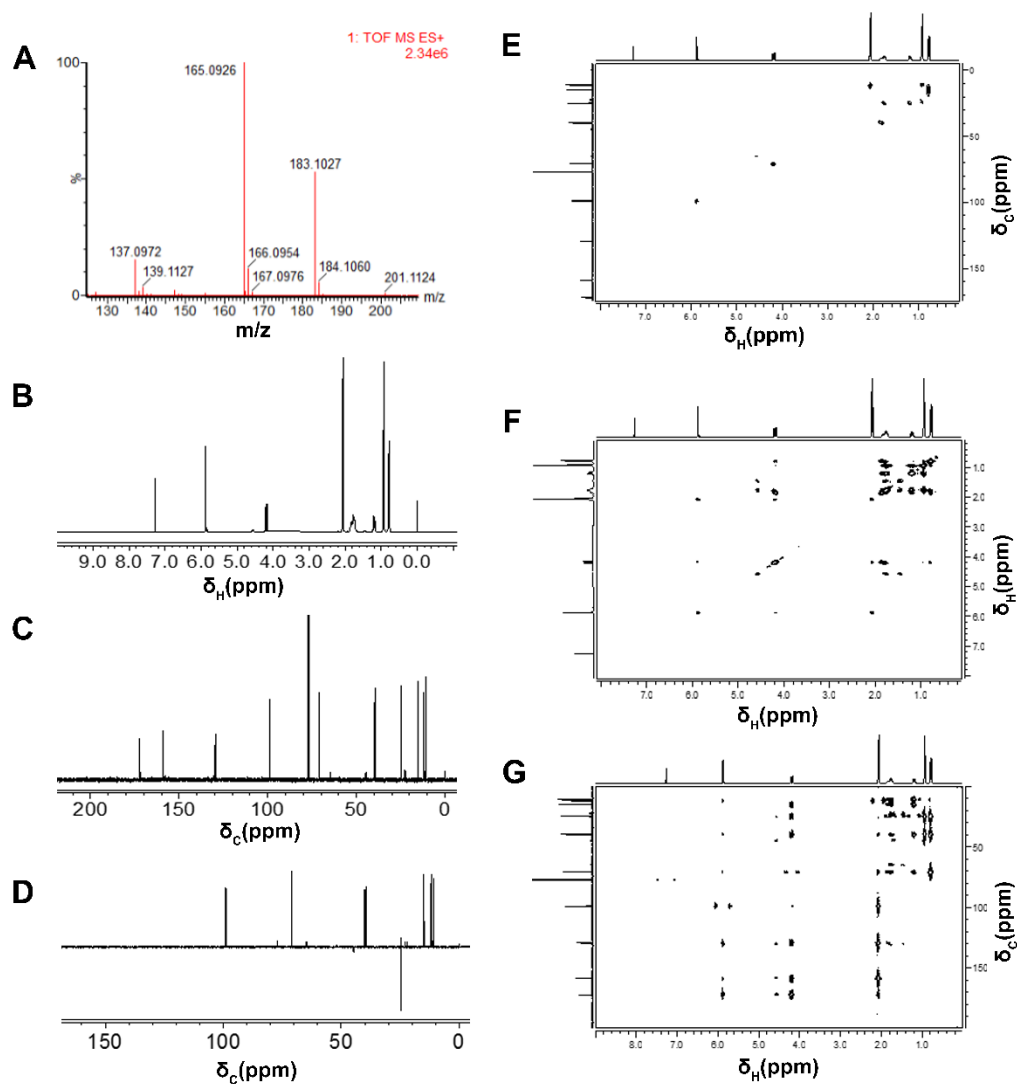

**Figure S3. HRMS and NMR analyses of SAB3 from *S. coelicolor* M1146 containing *sabAPD*.** (A) HRMS of SAB3. (B)  $^1\text{H}$ -NMR spectrum of SAB3. (C)  $^{13}\text{C}$ -NMR spectrum of SAB3. (D) DEPT135 spectrum of SAB3. (E)  $^1\text{H}$ - $^{13}\text{C}$  HSQC spectrum of SAB3. (F)  $^1\text{H}$ - $^1\text{H}$  COSY spectrum of SAB3. (G)  $^1\text{H}$ - $^{13}\text{C}$  HMBC spectrum of SAB3.



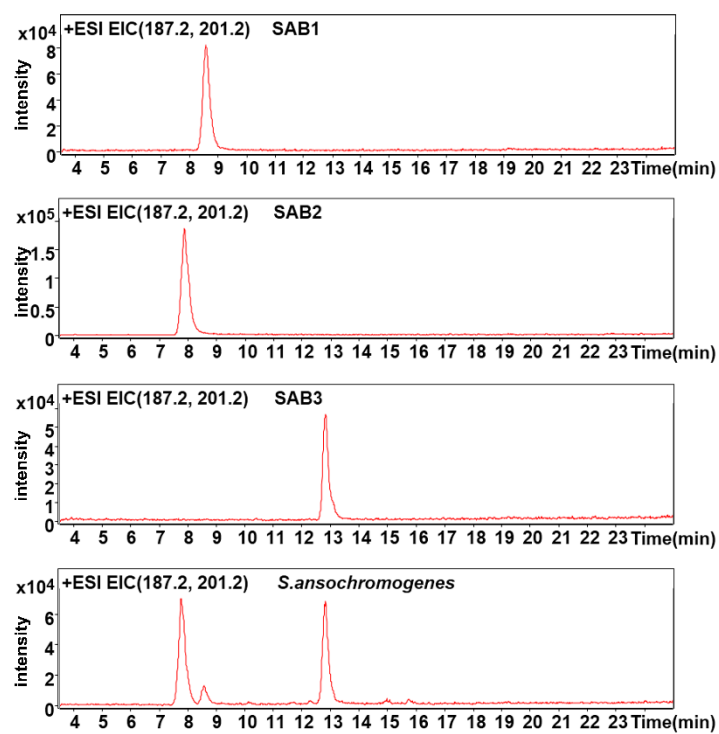

**Figure S4. LC-MS analysis of SABs in *S. ansochromogenes* 7100.** Extracted ion chromatograms (EIC) of  $m/z = 187$  (SAB1 and SAB2) and 201 (SAB3).

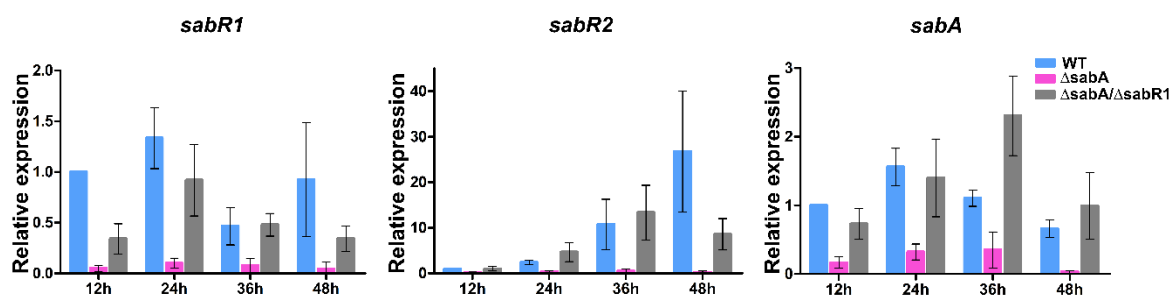

**Figure S5. qRT-PCR transcriptional analyses of *sabR1*, *sabR2* and *sabA* in WT,  $\Delta$ sabA and  $\Delta$ sabA/ $\Delta$ sabR1. WT, *S. ansochromogenes* 7100.  $\Delta$ sabA, *sabA* disruption mutant.  $\Delta$ sabA/ $\Delta$ sabR1, disruption mutant of *sabA* and *sabR1*. Error bars were calculated from three independent experiments and show standard deviations.**

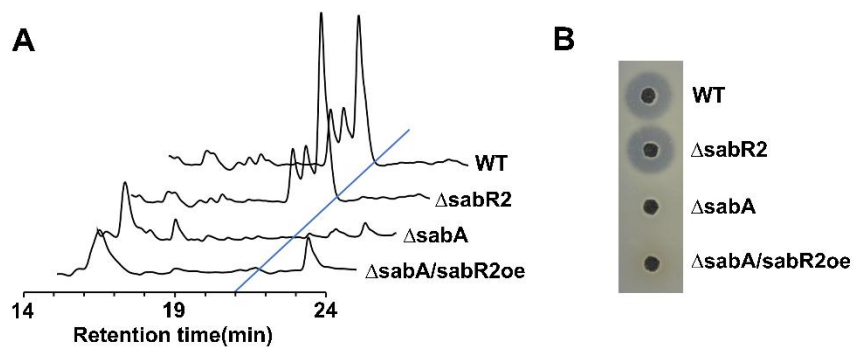

**Figure S6. Effect of *sabR2* disruption and overexpression on nikkomycin production.** (A) HPLC analysis of nikkomycin production in different strains. (B) Nikkomycin bioassays with fermentation filtrates of different strains. WT, *S. ansochromogenes* 7100 wild-type strains.  $\Delta sabR2$ , *sabR2* disruption strain.  $\Delta sabA$ , *sabA* disruption mutant.  $\Delta sabA/sabR2oe$ , *sabR2* overexpression strain in  $\Delta sabA$ .
